# Supplementary material
Source: PubMed Central journal article supplement (PMC5830398)
Supplement: 2017_186932-Disclosures_and_Contributions.pdf [file 2017_186932-Disclosures_and_Contributions.pdf]

Haematologica  
HAEMATOL/2017/186932  
Version 2

“MEK inhibition with Trametinib and tyrosine kinase inhibition with Imatinib in multifocal histiocytic sarcoma” by Voruz et al.

Sophie Voruz, Filipe Martins, Anne Cairoli, Olaia Naveiras, Krisztian Homicsko, Edoardo Missiaglia, Laurence de Leval, Olivier Michielin, and Sabine Blum

Disclosures: None

Contributions: Filipe Martins, Olaia Naveiras, Sabine Blum and Anne Cairoli were in charge of the patient. Laurence de Leval, Edoardo Missiaglia, Krisztian Homicsko and Olivier Michielin provided pathological knowledge and shared therapeutical decision with the in-charge team. Sophie Voruz and Filipe Martins wrote the article.
